# Supplementary material for: Optimized procedure for the determination of alkylamines in airborne particulate matter of anthropized areas
Source: Copernicus journal article supplement (doi:10.5194/ar-2023-3), 2023-06-05
Supplement: Supplementary file 1 [file ar-2023-3-supplement.pdf]

# Optimized procedure for the determination of alkylamines in airborne particulate matter of anthropized areas

Davide Spolaor<sup>1</sup>, Lidia Soldà<sup>1</sup>, Gianni Formenton<sup>2</sup>, Marco Roverso<sup>1</sup>, Denis Badocco<sup>1</sup>,  
Sara Bogialli<sup>1</sup>, Fazel A. Monikh<sup>1,3</sup>, Andrea Tapparo<sup>1</sup>

<sup>1</sup>Dipartimento di Scienze Chimiche, Università di Padova, via Marzolo 1, 35131 Padova, Italy

<sup>2</sup>ARPAV Environmental Regional Agency, Laboratory Department, via Lissa 6, 30171 Mestre,  
Venice, Italy

<sup>3</sup>Institute for Nanomaterials, Advanced Technologies and Innovation, Technical University of Liberec Bendlova 1409/7, 460 01, Liberec, Czech Republic

**Correspondence:** Andrea Tapparo (andrea.tapparo@unipd.it)

## Supplementary Material

**Table S1** Data acquired during the sampling campaign.

|            | PM10              | NOx               | NO                | NO2               | NH3 | H2S               | Temperature | Relative humidity |
|------------|-------------------|-------------------|-------------------|-------------------|-----|-------------------|-------------|-------------------|
|            | µg/m <sup>3</sup> | µg/m <sup>3</sup> | µg/m <sup>3</sup> | µg/m <sup>3</sup> | ppb | µg/m <sup>3</sup> | °C          | %                 |
| 18/09/2020 | 31,9              | 55                | 16                | 31                | 9   | 23                | 24          | 52                |
| 19/09/2020 | 23,5              | 24                | 5                 | 17                | 10  | 14                | 21          | 54                |
| 20/09/2020 | 22,2              | 17                | 2                 | 15                | 10  | 14                | 21          | 59                |
| 21/09/2020 | 28,1              | 48                | 13                | 29                | 13  | 16                | 23          | 58                |
| 22/09/2020 | 22,7              | 46                | 13                | 26                | 12  | 9                 | 20          | 86                |
| 23/09/2020 | 20,3              | 41                | 14                | 20                | 4   | 21                | 20          | 80                |
| 24/09/2020 | 23,8              | 46                | 14                | 24                | 0   | 9                 | 20          | 82                |
| 25/09/2020 | 14,7              | n/a               | n/a               | n/a               | n/a | 15                | 19          | 76                |
| 26/09/2020 | 13,3              | 19                | 4                 | 13                | 1   | 17                | 16          | 57                |
| 28/09/2020 | 21,8              | 66                | 25                | 27                | 2   | 11                | 14          | 75                |
| 29/09/2020 | 31,3              | 69                | 27                | 28                | 5   | 19                | 16          | 69                |
| 30/09/2020 | 39,9              | 53                | 15                | 29                | 13  | 15                | 17          | 71                |
| 01/10/2020 | 49,2              | 57                | 18                | 29                | 14  | 9                 | 18          | 73                |
| 02/10/2020 | 24,5              | 49                | 15                | 26                | 13  | 7                 | 17          | 95                |
| 03/10/2020 | 12,4              | 16                | 3                 | 11                | 8   | 20                | 18          | 81                |
| 04/10/2020 | 9,9               | 15                | 3                 | 11                | 3   | 16                | 15          | 81                |

|            |      |     |     |     |     |     |    |     |
|------------|------|-----|-----|-----|-----|-----|----|-----|
| 05/10/2020 | 20,7 | 57  | 21  | 25  | 5   | 18  | 16 | 79  |
| 06/10/2020 | 23,2 | 74  | 32  | 25  | 5   | 34  | 16 | 74  |
| 07/10/2020 | 26,1 | n/a | n/a | n/a | n/a | 16  | 17 | 75  |
| 14/10/2020 | 17,2 | 75  | 30  | 29  | 6   | 7   | 10 | 72  |
| 15/10/2020 | 16,7 | 56  | 11  | 39  | 7   | 12  | 11 | 94  |
| 16/10/2020 | 20   | 52  | 13  | 32  | 7   | 8   | 12 | 82  |
| 17/10/2020 | 55,1 | 40  | 11  | 23  | 5   | 8   | 11 | 88  |
| 18/10/2020 | 86,3 | 16  | 3   | 12  | 1   | 6   | 11 | 88  |
| 19/10/2020 | 73,3 | 35  | 11  | 19  | 1   | 6   | 12 | 86  |
| 20/10/2020 | 63,2 | 35  | 11  | 18  | 1   | 7   | 12 | 85  |
| 21/10/2020 | 73,6 | 40  | 12  | 21  | 4   | 7   | 12 | 88  |
| 22/10/2020 | 80,3 | 57  | 21  | 24  | 6   | 10  | 11 | 93  |
| 23/10/2020 | 66,1 | 39  | 10  | 24  | 5   | 7   | 13 | 97  |
| 24/10/2020 | 47,5 | 26  | 6   | 17  | 4   | 7   | 14 | 99  |
| 25/10/2020 | 16,6 | 17  | 3   | 12  | 4   | 5   | 15 | 84  |
| 26/10/2020 | 31,9 | 35  | 8   | 23  | 8   | 8   | 14 | 96  |
| 27/10/2020 | 16,4 | 25  | 5   | 17  | 3   | 7   | 12 | 94  |
| 28/10/2020 | 25,8 | 49  | 19  | 20  | 2   | 9   | 11 | 89  |
| 30/10/2020 | 48,6 | 48  | 16  | 23  | 5   | 37  | 12 | 90  |
| 31/10/2020 | 52,9 | 37  | 11  | 21  | 3   | 42  | 11 | 91  |
| 01/11/2020 | 60,9 | 39  | 14  | 17  | 3   | 47  | 10 | 100 |
| 02/11/2020 | 64,9 | 25  | 4   | 18  | 4   | 5   | 12 | 93  |
| 03/11/2020 | 50,5 | 24  | 4   | 17  | 4   | 42  | 14 | 82  |
| 05/11/2020 | n/a  | 35  | 9   | 22  | 4   | 147 | 15 | 80  |
| 06/11/2020 | 27,3 | 41  | 11  | 24  | 3   | 113 | 13 | 77  |
| 07/11/2020 | 31,5 | 33  | 8   | 22  | 2   | 88  | 12 | 78  |
| 08/11/2020 | 28,9 | 27  | 6   | 19  | 3   | 102 | 11 | 84  |
| 09/11/2020 | 39,9 | 55  | 18  | 27  | 3   | 52  | 11 | 85  |
| 10/11/2020 | 37,1 | 53  | 15  | 31  | 4   | 127 | 11 | 81  |
| 11/11/2020 | 26,8 | 38  | 8   | 26  | 4   | 104 | 10 | 72  |
| 12/11/2020 | 47,3 | 55  | 15  | 31  | 4   | 58  | 9  | 79  |
| 13/11/2020 | 65,1 | 79  | 31  | 32  | 6   | 50  | 8  | 90  |
| 14/11/2020 | 51,2 | 33  | 9   | 20  | 5   | 36  | 10 | 88  |
| 15/11/2020 | 51,5 | 24  | 5   | 16  | 3   | 31  | 9  | 86  |
| 16/11/2020 | 47,6 | 33  | 7   | 22  | 5   | 32  | 10 | 98  |
| 17/11/2020 | 23,4 | 54  | 17  | 28  | 3   | 79  | 10 | 86  |
| 18/11/2020 | 39,2 | 79  | 33  | 29  | 3   | 73  | 8  | 89  |

**Table S2** Measured concentrations of the principal cations and anions contained in PM10 samples.

|            | Sodium                   | Ammonium                 | Potassium                | Magnesium                | Calcium                  | Chloride                 | Nitrate                  | Sulfate                  |
|------------|--------------------------|--------------------------|--------------------------|--------------------------|--------------------------|--------------------------|--------------------------|--------------------------|
|            | $\mu\text{g}/\text{m}^3$ |
| LOD        | 0.04                     | 0.07                     | 0.04                     | 0.03                     | 0.06                     | 0.28                     | 0.20                     | 0.91                     |
| 18/09/2020 | 0.80                     | 0.93                     | 0.14                     | 0.10                     | 1.03                     | 0.12                     | 1.62                     | 2.75                     |
| 19/09/2020 | 0.84                     | 0.70                     | 0.14                     | 0.09                     | 0.73                     | 0.10                     | 1.51                     | 2.04                     |
| 20/09/2020 | 0.85                     | 0.95                     | 0.14                     | 0.09                     | 0.57                     | 0.08                     | 1.96                     | 2.17                     |
| 21/09/2020 | 0.86                     | 0.85                     | 0.15                     | 0.10                     | 0.95                     | 0.10                     | 1.93                     | 2.39                     |
| 22/09/2020 | 0.67                     | 1.01                     | 0.16                     | 0.10                     | 0.60                     | 0.11                     | 2.93                     | 1.97                     |
| 23/09/2020 | 0.59                     | 0.67                     | 0.10                     | 0.07                     | 0.75                     | 0.07                     | 2.26                     | 1.82                     |
| 24/09/2020 | 0.61                     | 1.59                     | 0.18                     | 0.10                     | 0.68                     | 0.09                     | 5.88                     | 1.81                     |
| 25/09/2020 | 0.73                     | 0.36                     | 0.12                     | 0.08                     | 0.47                     | 0.14                     | 1.64                     | 1.27                     |
| 26/09/2020 | 0.65                     | 0.07                     | 0.12                     | 0.06                     | 0.26                     | 0.13                     | 1.02                     | 0.74                     |
| 28/09/2020 | 0.64                     | 0.20                     | 0.06                     | 0.07                     | 0.53                     | 0.08                     | 1.45                     | 0.81                     |
| 29/09/2020 | 0.76                     | 1.16                     | 0.16                     | 0.08                     | 0.62                     | 0.09                     | 5.01                     | 1.00                     |
| 30/09/2020 | 0.74                     | 3.49                     | 0.30                     | 0.09                     | 0.78                     | 0.13                     | 12.68                    | 1.48                     |
| 01/10/2020 | 0.79                     | 4.53                     | 0.37                     | 0.11                     | 0.91                     | 0.18                     | 16.97                    | 1.96                     |
| 02/10/2020 | 0.87                     | 2.37                     | 0.24                     | 0.11                     | 0.45                     | 0.31                     | 7.48                     | 1.75                     |
| 03/10/2020 | 1.61                     | 0.13                     | 0.10                     | 0.16                     | 0.33                     | 0.58                     | 1.89                     | 1.62                     |
| 04/10/2020 | 0.93                     | 0.22                     | 0.07                     | 0.08                     | 0.22                     | 0.29                     | 1.54                     | 0.90                     |
| 05/10/2020 | 0.87                     | 0.20                     | 0.07                     | 0.09                     | 0.52                     | 0.28                     | 1.42                     | 1.10                     |
| 06/10/2020 | 1.14                     | 0.46                     | 0.14                     | 0.13                     | 0.64                     | 0.44                     | 2.76                     | 1.28                     |
| 07/10/2020 | 1.03                     | 0.55                     | 0.13                     | 0.12                     | 0.59                     | 0.16                     | 3.15                     | 1.25                     |
| 14/10/2020 | 0.63                     | 0.93                     | 0.21                     | 0.07                     | 0.50                     | 0.04                     | 3.90                     | 0.83                     |
| 15/10/2020 | 0.66                     | 0.31                     | 0.09                     | 0.05                     | 0.21                     | 0.07                     | 1.63                     | 0.70                     |
| 16/10/2020 | 0.67                     | 0.49                     | 0.18                     | 0.05                     | 0.26                     | 0.10                     | 1.95                     | 0.83                     |
| 17/10/2020 | 0.62                     | 2.94                     | 0.24                     | 0.07                     | 0.35                     | 0.10                     | 8.83                     | 1.17                     |
| 18/10/2020 | 1.12                     | 3.52                     | 0.41                     | 0.35                     | 2.13                     | 1.34                     | 11.85                    | 2.44                     |
| 19/10/2020 | 1.02                     | 4.75                     | 0.41                     | 0.28                     | 2.04                     | 1.18                     | 15.07                    | 2.71                     |
| 20/10/2020 | 0.68                     | 7.21                     | 0.25                     | 0.09                     | 0.67                     | 0.18                     | 21.92                    | 2.13                     |
| 21/10/2020 | 0.67                     | 8.30                     | 0.30                     | 0.10                     | 0.68                     | 0.29                     | 25.07                    | 2.29                     |
| 22/10/2020 | 0.70                     | 10.53                    | 0.32                     | 0.11                     | 0.65                     | 0.38                     | 31.52                    | 3.05                     |
| 23/10/2020 | 0.65                     | 8.50                     | 0.24                     | 0.08                     | 0.46                     | 0.27                     | 24.53                    | 2.96                     |
| 24/10/2020 | 0.62                     | 5.60                     | 0.24                     | 0.05                     | 0.26                     | 0.26                     | 14.94                    | 2.21                     |
| 25/10/2020 | 0.74                     | 1.47                     | 0.21                     | 0.05                     | 0.23                     | 0.12                     | 4.72                     | 1.04                     |
| 26/10/2020 | 0.86                     | 3.20                     | 0.22                     | 0.08                     | 0.30                     | 0.31                     | 8.65                     | 1.63                     |

|            |      |      |      |      |      |      |       |      |
|------------|------|------|------|------|------|------|-------|------|
| 27/10/2020 | 0.66 | 0.34 | 0.18 | 0.05 | 0.23 | 0.13 | 1.47  | 0.75 |
| 28/10/2020 | 0.73 | 0.81 | 0.29 | 0.07 | 0.39 | 0.19 | 3.22  | 0.92 |
| 30/10/2020 | 0.59 | 3.45 | 0.39 | 0.10 | 0.63 | 0.29 | 12.89 | 1.19 |
| 31/10/2020 | 0.61 | 4.13 | 0.56 | 0.08 | 0.42 | 0.35 | 14.68 | 1.56 |
| 01/11/2020 | 0.61 | 4.65 | 0.75 | 0.05 | 0.23 | 0.40 | 14.86 | 2.09 |
| 02/11/2020 | 0.62 | 4.25 | 0.68 | 0.07 | 0.34 | 0.34 | 13.45 | 2.05 |
| 03/11/2020 | 0.68 | 4.22 | 0.56 | 0.09 | 0.47 | 0.23 | 14.30 | 2.07 |
| 05/11/2020 | 1.56 | 0.23 | 0.61 | 0.55 | 3.85 | 2.69 | 2.83  | 3.46 |
| 06/11/2020 | 0.70 | 1.13 | 0.30 | 0.09 | 0.76 | 0.19 | 4.36  | 1.27 |
| 07/11/2020 | 0.70 | 1.14 | 0.31 | 0.07 | 0.42 | 0.18 | 4.16  | 1.11 |
| 08/11/2020 | 0.70 | 2.02 | 0.43 | 0.06 | 0.30 | 0.19 | 6.19  | 1.41 |
| 09/11/2020 | 0.75 | 2.76 | 0.46 | 0.10 | 0.78 | 0.25 | 9.83  | 1.44 |
| 10/11/2020 | 0.80 | 2.08 | 0.43 | 0.10 | 1.09 | 0.21 | 7.54  | 1.52 |
| 11/11/2020 | 0.77 | 1.56 | 0.35 | 0.08 | 0.79 | 0.18 | 4.34  | 2.23 |
| 12/11/2020 | 0.71 | 3.05 | 0.56 | 0.09 | 1.20 | 0.31 | 10.03 | 2.57 |
| 13/11/2020 | 0.75 | 5.19 | 0.86 | 0.11 | 1.03 | 0.38 | 18.93 | 2.69 |
| 14/11/2020 | 0.62 | 4.43 | 0.73 | 0.11 | 0.58 | 0.27 | 15.25 | 2.23 |
| 15/11/2020 | 0.80 | 5.28 | 0.89 | 0.08 | 0.45 | 0.32 | 17.81 | 2.32 |
| 16/11/2020 | 0.77 | 4.46 | 0.71 | 0.08 | 0.37 | 0.25 | 14.82 | 1.96 |
| 17/11/2020 | 0.83 | 0.40 | 0.24 | 0.09 | 0.61 | 0.32 | 2.06  | 0.89 |
| 18/11/2020 | 0.75 | 1.49 | 0.50 | 0.10 | 0.79 | 0.36 | 5.56  | 1.33 |

**Table S3** Measured concentration in PM10 samples of organic and elemental carbon.

|            | Organic carbon           | Elemental carbon         | Total carbon             |
|------------|--------------------------|--------------------------|--------------------------|
|            | $\mu\text{g}/\text{m}^3$ | $\mu\text{g}/\text{m}^3$ | $\mu\text{g}/\text{m}^3$ |
| 18/09/2020 | 6.15                     | 1.87                     | 8.01                     |
| 19/09/2020 | 5.37                     | 1.15                     | 6.52                     |
| 20/09/2020 | 5.08                     | 0.91                     | 6.00                     |
| 21/09/2020 | 5.81                     | 1.68                     | 7.49                     |
| 22/09/2020 | 4.93                     | 1.48                     | 6.42                     |
| 23/09/2020 | 4.58                     | 1.38                     | 5.96                     |
| 24/09/2020 | 4.89                     | 1.55                     | 6.44                     |
| 25/09/2020 | 4.97                     | 1.21                     | 6.19                     |
| 26/09/2020 | 5.74                     | 0.84                     | 6.58                     |
| 28/09/2020 | 3.81                     | 1.64                     | 5.45                     |
| 29/09/2020 | 4.96                     | 1.56                     | 6.51                     |
| 30/09/2020 | 5.74                     | 1.54                     | 7.28                     |
| 01/10/2020 | 6.34                     | 1.58                     | 7.91                     |
| 02/10/2020 | 4.51                     | 1.49                     | 6.00                     |
| 03/10/2020 | 2.98                     | 0.52                     | 3.50                     |
| 04/10/2020 | 2.67                     | 0.56                     | 3.23                     |
| 05/10/2020 | 3.40                     | 1.43                     | 4.83                     |
| 06/10/2020 | 4.97                     | 1.82                     | 6.79                     |
| 07/10/2020 | 4.65                     | 1.47                     | 6.12                     |
| 14/10/2020 | 5.83                     | 1.32                     | 7.16                     |
| 15/10/2020 | 3.54                     | 0.75                     | 4.29                     |
| 16/10/2020 | 3.90                     | 0.97                     | 4.87                     |
| 17/10/2020 | 6.07                     | 1.35                     | 7.42                     |
| 18/10/2020 | 16.03                    | 0.93                     | 16.95                    |
| 19/10/2020 | 11.78                    | 1.41                     | 13.19                    |
| 20/10/2020 | 8.10                     | 1.46                     | 9.56                     |
| 21/10/2020 | 10.82                    | 1.63                     | 12.44                    |
| 22/10/2020 | 10.85                    | 1.60                     | 12.45                    |
| 23/10/2020 | 9.01                     | 1.37                     | 10.39                    |
| 24/10/2020 | 7.26                     | 1.28                     | 8.54                     |
| 25/10/2020 | 4.18                     | 0.76                     | 4.94                     |
| 26/10/2020 | 6.33                     | 1.31                     | 7.65                     |
| 27/10/2020 | 4.76                     | 1.04                     | 5.81                     |
| 28/10/2020 | 7.00                     | 1.67                     | 8.67                     |
| 30/10/2020 | 7.42                     | 1.59                     | 9.02                     |
| 31/10/2020 | 8.38                     | 1.63                     | 10.01                    |
| 01/11/2020 | 9.51                     | 1.61                     | 11.12                    |
| 02/11/2020 | 8.91                     | 1.64                     | 10.55                    |
| 03/11/2020 | 8.78                     | 1.45                     | 10.23                    |
| 05/11/2020 | 21.85                    | 0.86                     | 22.71                    |
| 06/11/2020 | 6.66                     | 1.59                     | 8.25                     |
| 07/11/2020 | 6.86                     | 1.63                     | 8.50                     |
| 08/11/2020 | 6.79                     | 1.38                     | 8.17                     |

|            |       |      |       |
|------------|-------|------|-------|
| 09/11/2020 | 8.61  | 1.79 | 10.41 |
| 10/11/2020 | 8.23  | 1.88 | 10.12 |
| 11/11/2020 | 6.36  | 1.56 | 7.92  |
| 12/11/2020 | 9.17  | 1.78 | 10.95 |
| 13/11/2020 | 11.07 | 1.94 | 13.01 |
| 14/11/2020 | 9.34  | 1.64 | 10.98 |
| 15/11/2020 | 9.95  | 1.51 | 11.46 |
| 16/11/2020 | 8.39  | 1.48 | 9.86  |
| 17/11/2020 | 5.65  | 1.62 | 7.28  |
| 18/11/2020 | 8.51  | 2.28 | 10.79 |

**Table S4** Measured concentrations of the amines contained in PM10.

|       | MA (ng/m <sup>3</sup> ) |       | EA (ng/m <sup>3</sup> ) |       | DMA (ng/m <sup>3</sup> ) |       | PA (ng/m <sup>3</sup> ) |       | DEA (ng/m <sup>3</sup> ) |       |
|-------|-------------------------|-------|-------------------------|-------|--------------------------|-------|-------------------------|-------|--------------------------|-------|
|       | Mean                    | SD    | Mean                    | SD    | Mean                     | SD    | Mean                    | SD    | Mean                     | SD    |
| 18/9  | 5.721                   | 0.015 | 2.255                   | 0.000 | 12.647                   | 0.027 | 1.114                   | 0.000 | 4.579                    | 0.043 |
| 19/9  | 4.700                   | 0.086 | 2.175                   | 0.004 | 12.268                   | 0.001 | 0.803                   | 0.000 | 3.258                    | 0.032 |
| 20/9  | 6.254                   | 0.014 | 2.531                   | 0.014 | 12.587                   | 0.009 | 1.102                   | 0.000 | 3.572                    | 0.017 |
| 21/9  | 6.827                   | 0.013 | 2.819                   | 0.007 | 14.522                   | 0.015 | 1.206                   | 0.005 | 4.37                     | 0.12  |
| 22/9  | 10.283                  | 0.014 | 2.882                   | 0.007 | 16.570                   | 0.018 | 1.090                   | 0.006 | 5.255                    | 0.021 |
| 23/9  | 8.537                   | 0.012 | 2.918                   | 0.019 | 15.541                   | 0.061 | 1.051                   | 0.002 | 5.081                    | 0.022 |
| 24/9  | 13.677                  | 0.000 | 2.661                   | 0.008 | 20.035                   | 0.029 | 0.980                   | 0.018 | 6.065                    | 0.028 |
| 25/9  | 5.930                   | 0.056 | 1.444                   | 0.005 | 9.996                    | 0.027 | 0.448                   | 0.005 | 2.549                    | 0.003 |
| 26/9  | 0.924                   | 0.006 | 0.566                   | 0.000 | 5.449                    | 0.007 | 0.297                   | 0.004 | 1.350                    | 0.021 |
| 27/9  | 1.172                   | 0.019 | 0.490                   | 0.001 | 5.101                    | 0.004 | 0.398                   | 0.002 | 1.332                    | 0.002 |
| 28/9  | 4.486                   | 0.002 | 1.570                   | 0.004 | 9.257                    | 0.005 | 0.744                   | 0.000 | 3.001                    | 0.012 |
| 29/9  | 10.120                  | 0.018 | 3.542                   | 0.040 | 22.001                   | 0.080 | 1.886                   | 0.014 | 6.405                    | 0.090 |
| 30/9  | 18.267                  | 0.052 | 4.883                   | 0.000 | 25.202                   | 0.038 | 3.838                   | 0.000 | 8.395                    | 0.000 |
| 1/10  | 20.495                  | 0.006 | 4.382                   | 0.016 | 23.702                   | 0.034 | 4.433                   | 0.001 | 8.842                    | 0.086 |
| 2/10  | 14.771                  | 0.019 | 2.873                   | 0.005 | 16.538                   | 0.032 | 1.587                   | 0.004 | 5.366                    | 0.094 |
| 3/10  | 2.703                   | 0.019 | 0.749                   | 0.007 | 6.018                    | 0.006 | 0.463                   | 0.008 | 1.757                    | 0.047 |
| 4/10  | 4.316                   | 0.011 | 3.440                   | 0.035 | 9.053                    | 0.021 | 1.248                   | 0.005 | 2.006                    | 0.081 |
| 5/10  | 4.249                   | 0.008 | 3.509                   | 0.001 | 10.019                   | 0.028 | 1.689                   | 0.004 | 2.219                    | 0.018 |
| 6/10  | 6.610                   | 0.025 | 4.651                   | 0.009 | 15.406                   | 0.021 | 2.283                   | 0.006 | 4.897                    | 0.003 |
| 7/10  | 7.975                   | 0.065 | 4.230                   | 0.011 | 12.426                   | 0.046 | 2.822                   | 0.028 | 3.532                    | 0.061 |
| 13/10 | 2.422                   | 0.016 | 1.571                   | 0.008 | 8.610                    | 0.002 | 0.410                   | 0.008 | 1.938                    | 0.004 |
| 14/10 | 4.756                   | 0.002 | 2.364                   | 0.087 | 10.131                   | 0.019 | 1.256                   | 0.007 | 3.964                    | 0.060 |
| 15/10 | 2.988                   | 0.061 | 1.320                   | 0.032 | 13.057                   | 0.030 | 0.512                   | 0.003 | 5.075                    | 0.149 |
| 16/10 | 3.626                   | 0.046 | 0.783                   | 0.003 | 8.986                    | 0.002 | 0.405                   | 0.004 | 3.522                    | 0.023 |
| 17/10 | 10.262                  | 0.068 | 1.611                   | 0.002 | 16.026                   | 0.053 | 1.010                   | 0.024 | 4.638                    | 0.003 |
| 18/10 | 11.737                  | 0.013 | 1.451                   | 0.015 | 31.261                   | 0.780 | 1.185                   | 0.003 | 3.688                    | 0.010 |
| 19/10 | 14.944                  | 0.011 | 2.706                   | 0.012 | 36.749                   | 0.219 | 1.578                   | 0.007 | 6.340                    | 0.030 |
| 20/10 | 13.820                  | 0.052 | 5.056                   | 0.012 | 25.155                   | 0.062 | 3.000                   | 0.003 | 9.412                    | 0.054 |
| 21/10 | 18.053                  | 0.053 | 4.847                   | 0.003 | 23.72                    | 0.16  | 4.519                   | 0.011 | 9.078                    | 0.052 |
| 22/10 | 19.337                  | 0.062 | 4.263                   | 0.003 | 27.23                    | 0.14  | 4.410                   | 0.004 | 7.614                    | 0.048 |
| 23/10 | 14.582                  | 0.040 | 3.658                   | 0.063 | 25.952                   | 0.032 | 3.340                   | 0.059 | 7.940                    | 0.017 |
| 24/10 | 19.665                  | 0.028 | 2.778                   | 0.023 | 26.877                   | 0.176 | 3.053                   | 0.009 | 5.168                    | 0.011 |
| 25/10 | 6.254                   | 0.022 | 1.483                   | 0.009 | 9.253                    | 0.004 | 1.014                   | 0.001 | 3.057                    | 0.015 |
| 26/10 | 12.297                  | 0.016 | 2.228                   | 0.001 | 15.927                   | 0.022 | 1.271                   | 0.012 | 5.624                    | 0.008 |
| 27/10 | 3.305                   | 0.014 | 0.743                   | 0.004 | 7.143                    | 0.000 | 0.287                   | 0.002 | 2.535                    | 0.010 |
| 28/10 | 7.241                   | 0.013 | 1.882                   | 0.001 | 13.071                   | 0.021 | 0.462                   | 0.004 | 5.500                    | 0.023 |
| 30/10 | 8.462                   | 0.048 | 1.463                   | 0.099 | 23.216                   | 0.002 | 1.290                   | 0.010 | 3.633                    | 0.019 |
| 31/10 | 15.160                  | 0.025 | 2.119                   | 0.024 | 26.001                   | 0.011 | 3.031                   | 0.004 | 3.508                    | 0.023 |
| 1/11  | 17.26                   | 0.21  | 2.111                   | 0.010 | 28.439                   | 0.053 | 3.592                   | 0.002 | 3.460                    | 0.009 |
| 2/11  | 15.694                  | 0.109 | 2.917                   | 0.036 | 26.936                   | 0.080 | 2.357                   | 0.009 | 3.977                    | 0.032 |
| 3/11  | 15.462                  | 0.026 | 2.784                   | 0.015 | 26.443                   | 0.034 | 1.793                   | 0.004 | 4.988                    | 0.027 |
| 5/11  | 3.165                   | 0.003 | 0.457                   | 0.015 | 16.344                   | 0.019 | 0.288                   | 0.026 | 0.899                    | 0.014 |
| 6/11  | 6.872                   | 0.012 | 1.558                   | 0.004 | 16.831                   | 0.025 | 1.105                   | 0.008 | 3.087                    | 0.003 |

|       |        |       |       |       |        |       |       |       |       |       |
|-------|--------|-------|-------|-------|--------|-------|-------|-------|-------|-------|
| 7/11  | 6.124  | 0.002 | 1.417 | 0.005 | 13.033 | 0.012 | 1.578 | 0.007 | 2.357 | 0.001 |
| 8/11  | 6.962  | 0.053 | 1.120 | 0.007 | 25.823 | 0.002 | 1.682 | 0.007 | 3.447 | 0.051 |
| 9/11  | 10.361 | 0.031 | 1.815 | 0.010 | 35.623 | 0.119 | 2.433 | 0.019 | 6.059 | 0.031 |
| 10/11 | 8.953  | 0.015 | 1.694 | 0.009 | 33.630 | 0.051 | 2.120 | 0.004 | 4.919 | 0.057 |
| 11/11 | 5.944  | 0.009 | 1.418 | 0.002 | 21.316 | 0.023 | 0.671 | 0.009 | 3.211 | 0.027 |
| 12/11 | 9.670  | 0.006 | 2.130 | 0.001 | 34.460 | 0.030 | 2.549 | 0.002 | 6.400 | 0.044 |
| 13/11 | 18.226 | 0.048 | 3.147 | 0.003 | 35.848 | 0.088 | 5.036 | 0.012 | 7.568 | 0.014 |
| 14/11 | 13.188 | 0.023 | 2.453 | 0.007 | 24.486 | 0.017 | 2.411 | 0.008 | 3.890 | 0.008 |
| 15/11 | 18.409 | 0.011 | 3.416 | 0.009 | 28.152 | 0.040 | 3.304 | 0.024 | 3.699 | 0.016 |
| 16/11 | 16.390 | 0.007 | 2.331 | 0.007 | 24.147 | 0.049 | 1.878 | 0.005 | 4.375 | 0.046 |
| 17/11 | 3.648  | 0.011 | 1.209 | 0.001 | 11.413 | 0.010 | 0.566 | 0.000 | 3.730 | 0.032 |
| 18/11 | 8.510  | 0.038 | 1.528 | 0.001 | 21.694 | 0.030 | 1.443 | 0.006 | 3.557 | 0.028 |



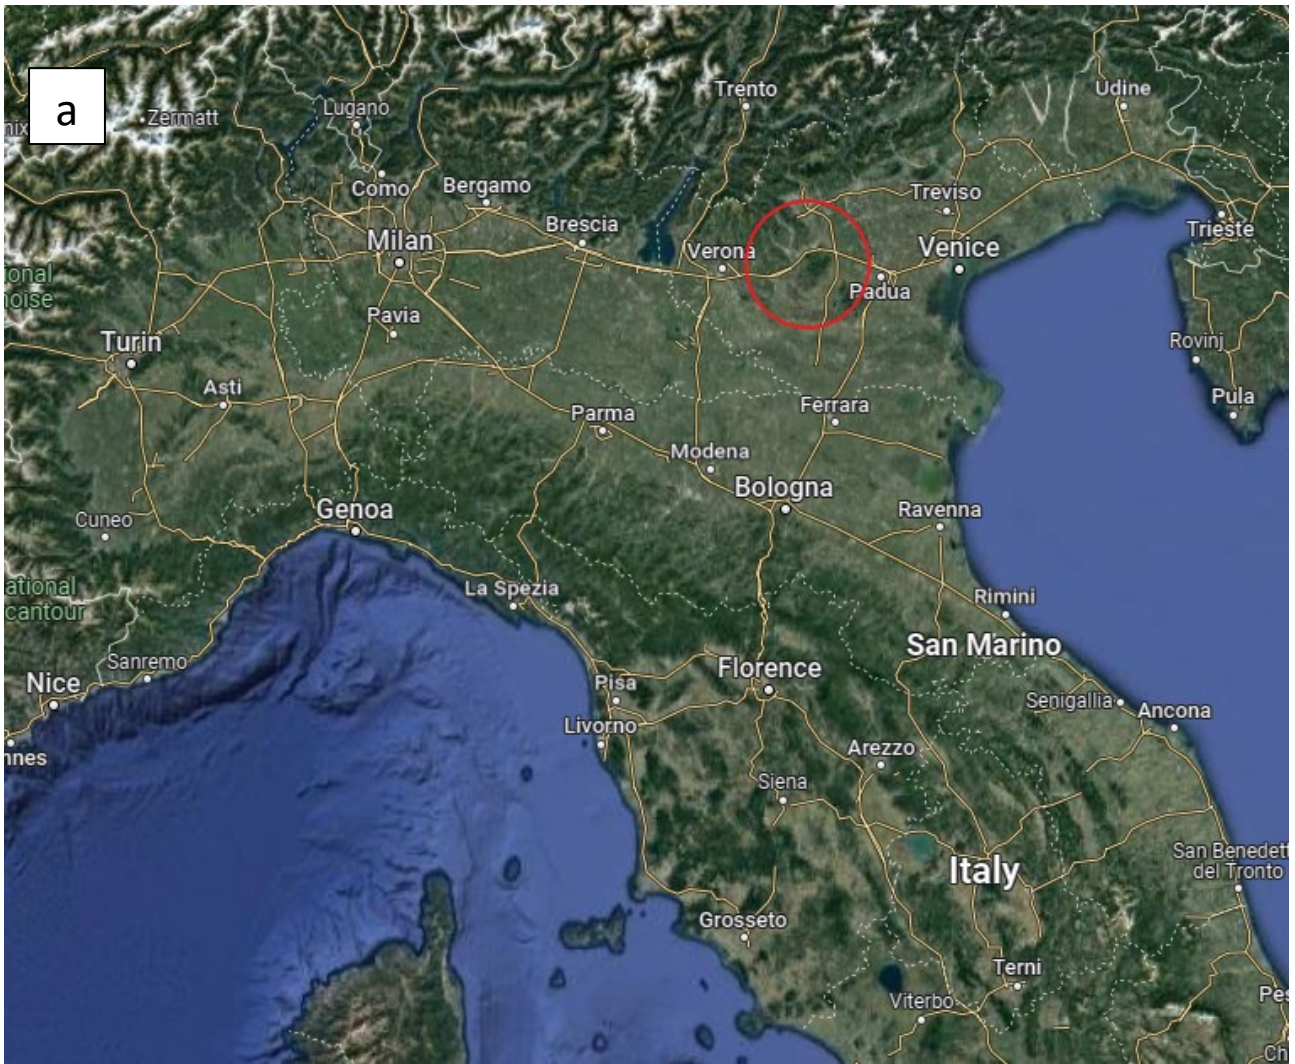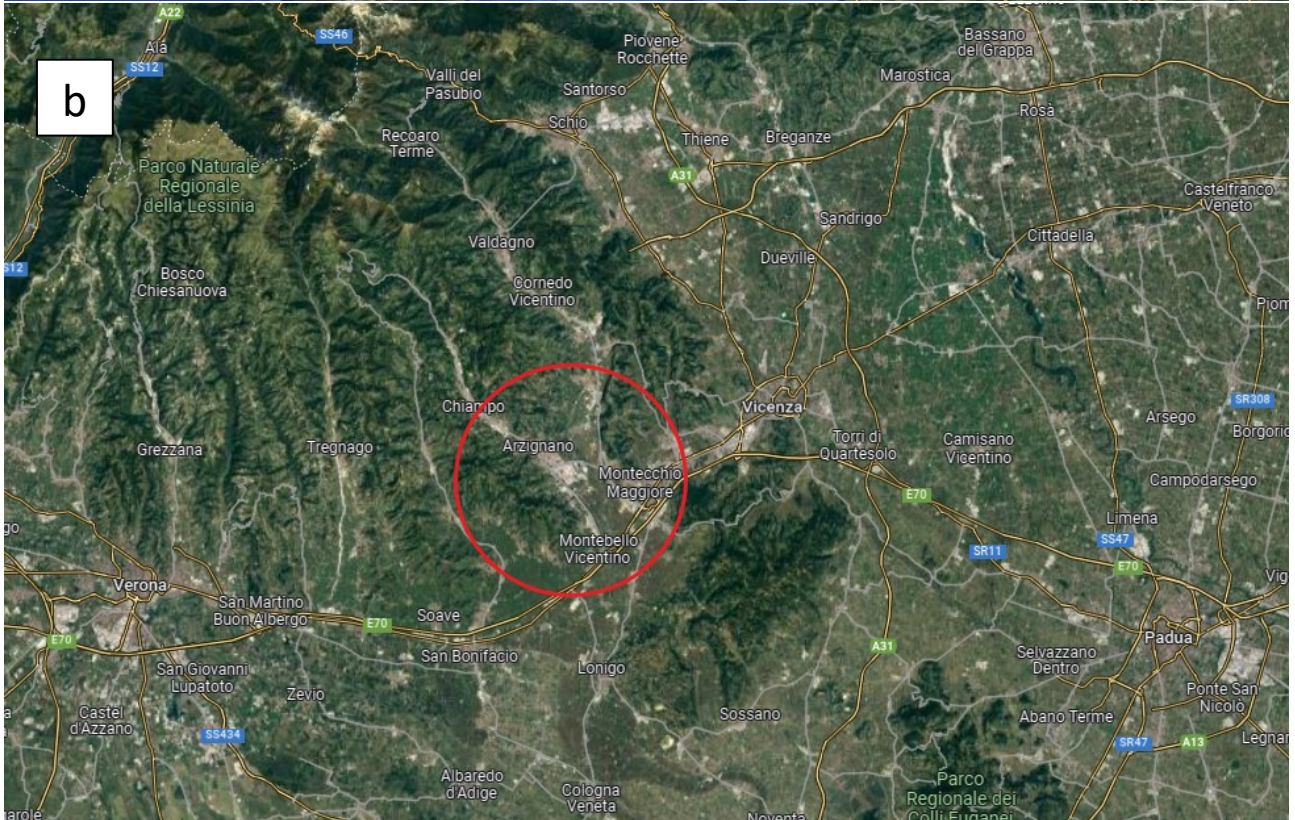



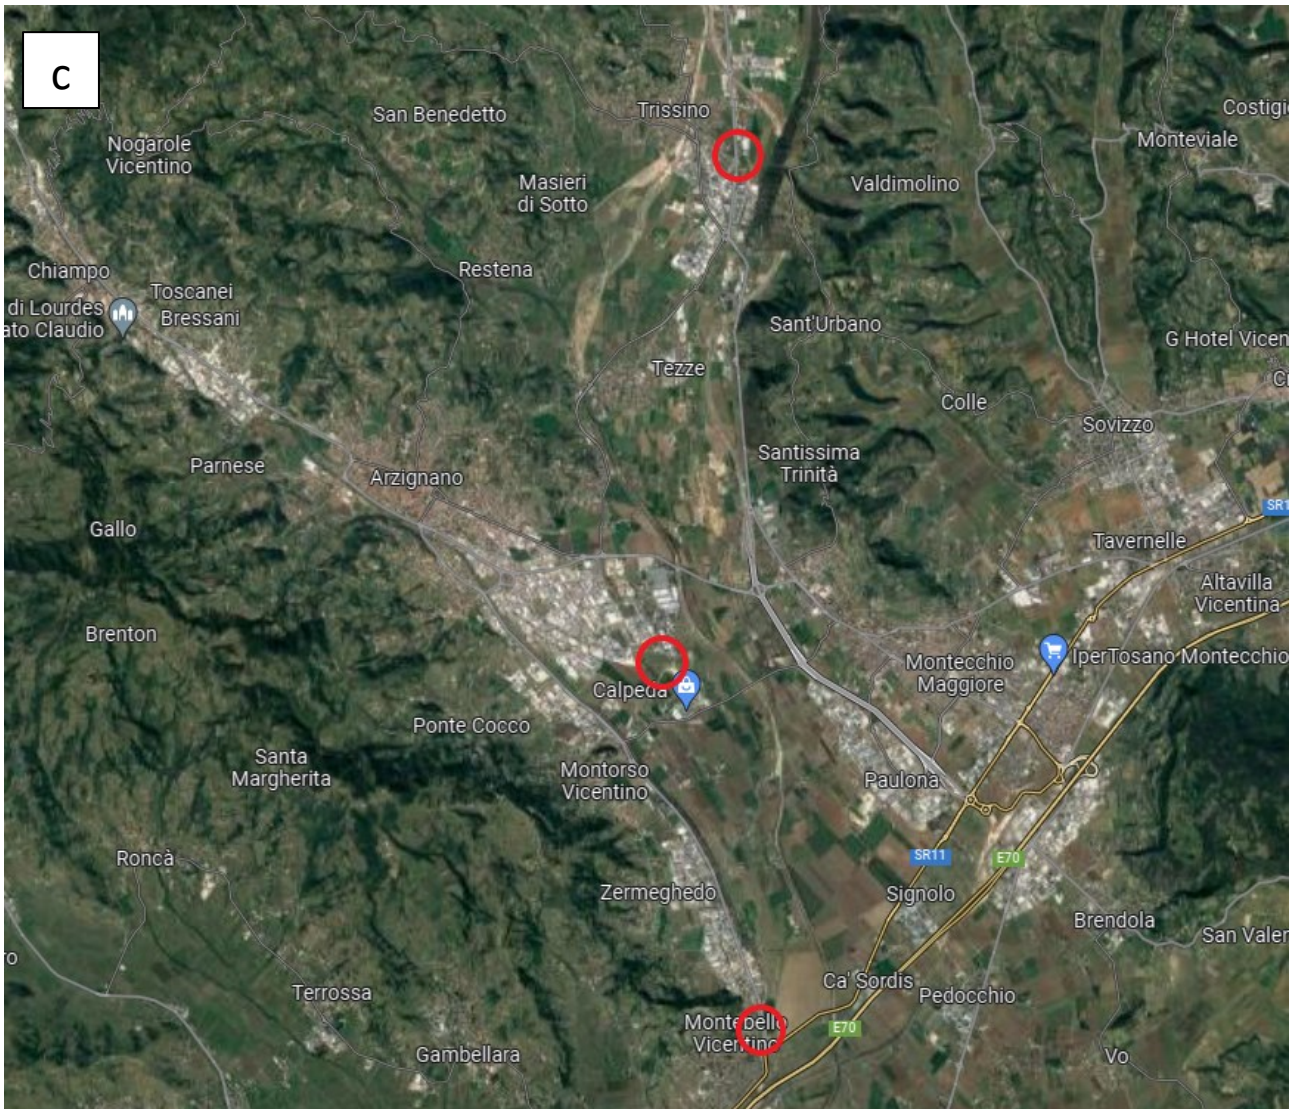

**Figure S1** (a) Map of northern Italy; (b) Map of the province of Vicenza; (c) Map of the industrial area of the Chiampo Valley. The red circles indicate the three sampling sites. Images from “ © Google Maps” in accordance with the Fair Use guidelines for publications (<https://about.google/brand-resource-center/products-and-services/geo-guidelines/>).

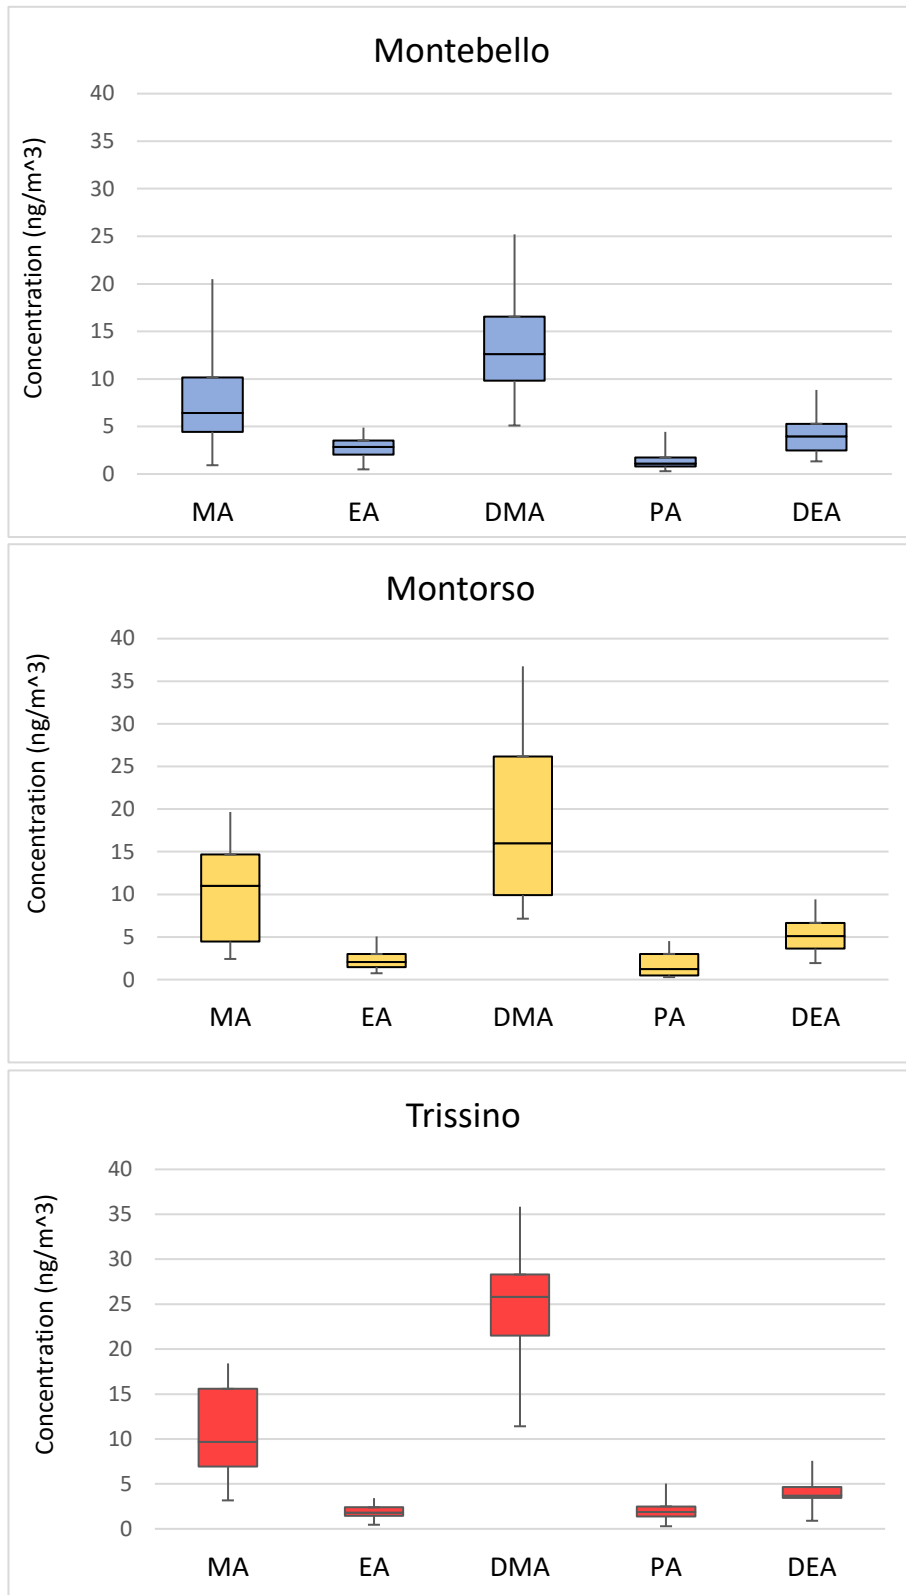

**Figure S2:** Box-plot of amines concentrations in the sites of Montebello, Montorso e Trissino.

**Table 5S** Comparison between the results obtained with FLD and MS analysis of three different samples of PM10.

|                   |         | sample 1 |       | sample 2 |       | sample 3 |       |
|-------------------|---------|----------|-------|----------|-------|----------|-------|
|                   |         | FLD      | Q-TOF | FLD      | Q-TOF | FLD      | Q-TOF |
| <b>MA (µg/L)</b>  | Conc.   | 81.05    | 83.94 | 81.42    | 82.55 | 74.88    | 79.92 |
|                   | Dev Std | 1.09     | 1.82  | 0.22     | 1.67  | 0.57     | 0.68  |
|                   | P-value | 0.078    |       | 0.36     |       | 0.0006   |       |
| <b>EA (µg/L)</b>  | Conc.   | 72.30    | 71.23 | 64.70    | 59.87 | 62.00    | 62.09 |
|                   | Dev Std | 0.32     | 0.11  | 0.08     | 4.57  | 0.42     | 1.38  |
|                   | P-value | 0.005    |       | 0.21     |       | 0.92     |       |
| <b>DMA (µg/L)</b> | Conc.   | 85.59    | 84.40 | 86.92    | 85.50 | 83.43    | 84.26 |
|                   | Dev Std | 0.10     | 1.44  | 0.40     | 0.22  | 0.13     | 0.24  |
|                   | P-value | 0.29     |       | 0.006    |       | 0.006    |       |
| <b>PA (µg/L)</b>  | Conc.   | 67.01    | 65.56 | 63.31    | 62.66 | 61.14    | 60.88 |
|                   | Dev Std | 0.47     | 1.22  | 0.05     | 0.71  | 0.33     | 0.54  |
|                   | P-value | 0.13     |       | 0.26     |       | 0.51     |       |
| <b>DEA (µg/L)</b> | Conc.)  | 77.04    | 77.98 | 69.94    | 70.50 | 72.01    | 72.23 |
|                   | Dev Std | 0.41     | 1.24  | 0.78     | 0.85  | 0.20     | 0.38  |
|                   | P-value | 0.28     |       | 0.45     |       | 0.42     |       |

**Table S6** Pearson's correlation matrix of all the considered variables.

|      | PM10  | OC    | EC    | Na    | NH4   | K     | Mg    | Ca    | Cl    | NO3   | SO4   | MA    | EA    | DMA   | PA    | DEA   | T     | U     | H2S   | NO    | NO2   | NOx   | NH3   | Pg    |
|------|-------|-------|-------|-------|-------|-------|-------|-------|-------|-------|-------|-------|-------|-------|-------|-------|-------|-------|-------|-------|-------|-------|-------|-------|
| PM10 | 1,00  | 0,90  | 0,36  | -0,13 | 0,87  | 0,62  | 0,44  | 0,46  | 0,56  | 0,88  | 0,68  | 0,77  | 0,38  | 0,80  | 0,68  | 0,55  | -0,45 | 0,44  | -0,06 | -0,01 | -0,09 | -0,04 | -0,22 | -0,22 |
| OC   | 0,90  | 1,00  | 0,37  | -0,08 | 0,71  | 0,70  | 0,54  | 0,58  | 0,65  | 0,72  | 0,64  | 0,61  | 0,14  | 0,80  | 0,52  | 0,37  | -0,53 | 0,36  | 0,14  | -0,03 | -0,13 | -0,07 | -0,35 | -0,26 |
| EC   | 0,36  | 0,37  | 1,00  | -0,30 | 0,26  | 0,45  | -0,03 | 0,29  | -0,05 | 0,29  | 0,28  | 0,38  | 0,27  | 0,50  | 0,43  | 0,38  | -0,23 | 0,06  | 0,42  | 0,63  | 0,51  | 0,64  | -0,05 | -0,26 |
| Na   | -0,13 | -0,08 | -0,30 | 1,00  | -0,24 | -0,21 | 0,60  | 0,29  | 0,52  | -0,22 | 0,06  | -0,21 | 0,03  | -0,15 | -0,13 | -0,19 | 0,23  | -0,18 | -0,05 | -0,08 | -0,24 | -0,14 | 0,18  | -0,10 |
| NH4  | 0,87  | 0,71  | 0,26  | -0,24 | 1,00  | 0,51  | 0,15  | 0,15  | 0,29  | 0,99  | 0,69  | 0,84  | 0,51  | 0,69  | 0,78  | 0,67  | -0,38 | 0,49  | -0,13 | -0,05 | -0,10 | -0,07 | -0,11 | -0,14 |
| K    | 0,62  | 0,70  | 0,45  | -0,21 | 0,51  | 1,00  | 0,09  | 0,15  | 0,30  | 0,57  | 0,42  | 0,61  | 0,04  | 0,73  | 0,53  | 0,16  | -0,62 | 0,43  | 0,34  | -0,01 | -0,05 | -0,03 | -0,24 | -0,20 |
| Mg   | 0,44  | 0,54  | -0,03 | 0,60  | 0,15  | 0,09  | 1,00  | 0,83  | 0,89  | 0,18  | 0,38  | 0,17  | 0,09  | 0,35  | 0,05  | 0,12  | 0,00  | 0,01  | -0,10 | -0,03 | -0,19 | -0,10 | -0,07 | -0,12 |
| Ca   | 0,46  | 0,58  | 0,29  | 0,29  | 0,15  | 0,15  | 0,83  | 1,00  | 0,66  | 0,17  | 0,49  | 0,19  | 0,13  | 0,51  | 0,14  | 0,30  | 0,00  | -0,19 | 0,10  | 0,16  | 0,14  | 0,16  | -0,05 | -0,20 |
| Cl   | 0,56  | 0,65  | -0,05 | 0,52  | 0,29  | 0,30  | 0,89  | 0,66  | 1,00  | 0,31  | 0,37  | 0,26  | -0,01 | 0,45  | 0,13  | 0,03  | -0,29 | 0,31  | -0,04 | -0,10 | -0,32 | -0,20 | -0,29 | -0,15 |
| NO3  | 0,88  | 0,72  | 0,29  | -0,22 | 0,99  | 0,57  | 0,18  | 0,17  | 0,31  | 1,00  | 0,65  | 0,86  | 0,52  | 0,72  | 0,82  | 0,67  | -0,42 | 0,50  | -0,10 | 0,00  | -0,08 | -0,03 | -0,12 | -0,14 |
| SO4  | 0,68  | 0,64  | 0,28  | 0,06  | 0,69  | 0,42  | 0,38  | 0,49  | 0,37  | 0,65  | 1,00  | 0,63  | 0,41  | 0,62  | 0,54  | 0,49  | 0,06  | 0,07  | -0,07 | -0,13 | -0,07 | -0,13 | 0,14  | -0,16 |
| MA   | 0,77  | 0,61  | 0,38  | -0,21 | 0,84  | 0,61  | 0,17  | 0,19  | 0,26  | 0,86  | 0,63  | 1,00  | 0,59  | 0,74  | 0,82  | 0,68  | -0,22 | 0,47  | -0,15 | 0,03  | -0,03 | 0,01  | 0,06  | -0,08 |
| EA   | 0,38  | 0,14  | 0,27  | 0,03  | 0,51  | 0,04  | 0,09  | 0,13  | -0,01 | 0,52  | 0,41  | 0,59  | 1,00  | 0,30  | 0,71  | 0,68  | 0,19  | -0,01 | -0,33 | 0,26  | 0,07  | 0,23  | 0,25  | -0,10 |
| DMA  | 0,80  | 0,80  | 0,50  | -0,15 | 0,69  | 0,73  | 0,35  | 0,51  | 0,45  | 0,72  | 0,62  | 0,74  | 0,30  | 1,00  | 0,66  | 0,56  | -0,47 | 0,39  | 0,27  | 0,09  | 0,10  | 0,09  | -0,22 | -0,13 |
| PA   | 0,68  | 0,52  | 0,43  | -0,13 | 0,78  | 0,53  | 0,05  | 0,14  | 0,13  | 0,82  | 0,54  | 0,82  | 0,71  | 0,66  | 1,00  | 0,66  | -0,26 | 0,28  | -0,01 | 0,24  | 0,11  | 0,22  | 0,09  | -0,22 |
| DEA  | 0,55  | 0,37  | 0,38  | -0,19 | 0,67  | 0,16  | 0,12  | 0,30  | 0,03  | 0,67  | 0,49  | 0,68  | 0,68  | 0,56  | 0,66  | 1,00  | -0,06 | 0,20  | -0,22 | 0,30  | 0,35  | 0,34  | 0,17  | 0,08  |
| T    | -0,45 | -0,53 | -0,23 | 0,23  | -0,38 | -0,62 | 0,00  | 0,00  | -0,29 | -0,42 | 0,06  | -0,22 | 0,19  | -0,47 | -0,26 | -0,06 | 1,00  | -0,63 | -0,38 | -0,13 | -0,06 | -0,12 | 0,58  | 0,06  |
| U    | 0,44  | 0,36  | 0,06  | -0,18 | 0,49  | 0,43  | 0,01  | -0,19 | 0,31  | 0,50  | 0,07  | 0,47  | -0,01 | 0,39  | 0,28  | 0,20  | -0,63 | 1,00  | -0,03 | -0,05 | -0,08 | -0,06 | -0,32 | 0,24  |
| H2S  | -0,06 | 0,14  | 0,42  | -0,05 | -0,13 | 0,34  | -0,10 | 0,10  | -0,04 | -0,10 | -0,07 | -0,15 | -0,33 | 0,27  | -0,01 | -0,22 | -0,38 | -0,03 | 1,00  | 0,08  | 0,21  | 0,12  | -0,27 | -0,19 |
| NO   | -0,01 | -0,03 | 0,63  | -0,08 | -0,05 | -0,01 | -0,03 | 0,16  | -0,10 | 0,00  | -0,13 | 0,03  | 0,26  | 0,09  | 0,24  | 0,30  | -0,13 | -0,05 | 0,08  | 1,00  | 0,66  | 0,96  | 0,07  | -0,07 |
| NO2  | -0,09 | -0,13 | 0,51  | -0,24 | -0,10 | -0,05 | -0,19 | 0,14  | -0,32 | -0,08 | -0,07 | -0,03 | 0,07  | 0,10  | 0,11  | 0,35  | -0,06 | -0,08 | 0,21  | 0,66  | 1,00  | 0,84  | 0,34  | 0,32  |
| Nox  | -0,04 | -0,07 | 0,64  | -0,14 | -0,07 | -0,03 | -0,10 | 0,16  | -0,20 | -0,03 | -0,13 | 0,01  | 0,23  | 0,09  | 0,22  | 0,34  | -0,12 | -0,06 | 0,12  | 0,96  | 0,84  | 1,00  | 0,18  | 0,07  |
| NH3  | -0,22 | -0,35 | -0,05 | 0,18  | -0,11 | -0,24 | -0,07 | -0,05 | -0,29 | -0,12 | 0,14  | 0,06  | 0,25  | -0,22 | 0,09  | 0,17  | 0,58  | -0,32 | -0,27 | 0,07  | 0,34  | 0,18  | 1,00  | 0,07  |
| Pg   | -0,22 | -0,26 | -0,26 | -0,10 | -0,14 | -0,20 | -0,12 | -0,20 | -0,15 | -0,14 | -0,16 | -0,08 | -0,10 | -0,13 | -0,22 | 0,08  | 0,06  | 0,24  | -0,19 | -0,07 | 0,32  | 0,07  | 0,07  | 1,00  |

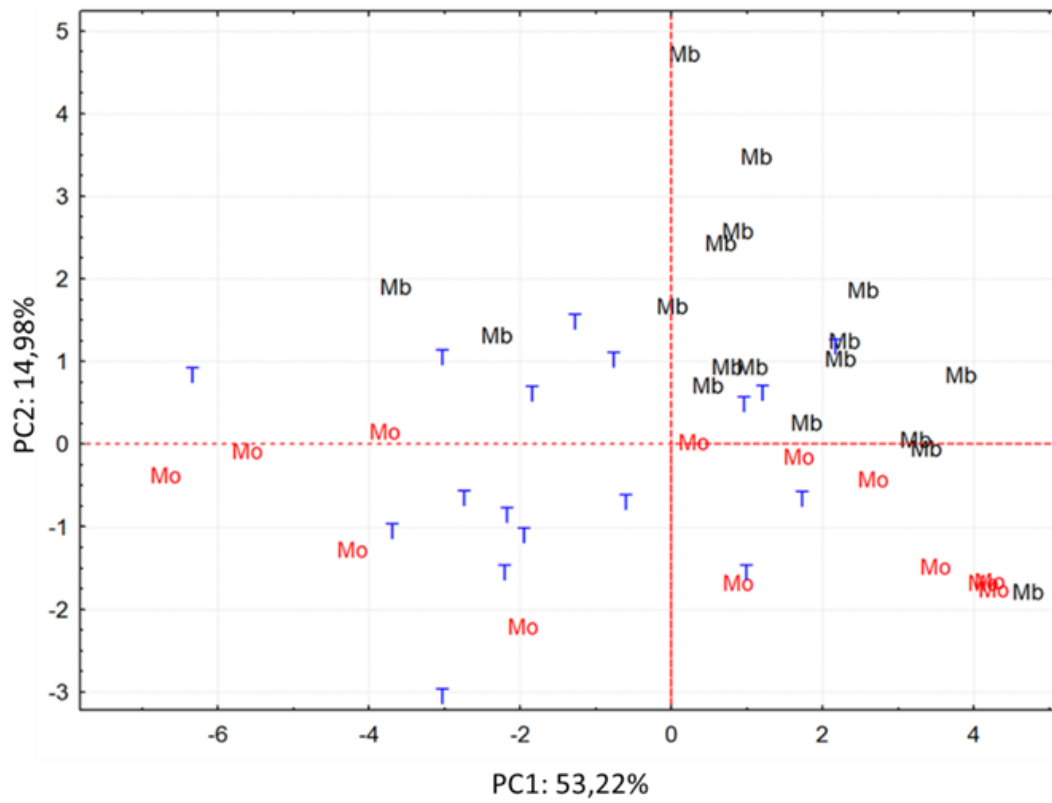

**Figure S3** Score plot (PCA), Mb corresponds to Montebello, Mo to Montorso and T to Trissino.
